# Supplementary material for: The flexible linker of the secreted FliK ruler is required for export switching of the flagellar protein export apparatus
Source: PubMed Central journal article supplement (PMC6972891; doi:10.1038/s41598-020-57782-5), 2020-01-21
Supplement: 41598_2020_57782_MOESM1_ESM.pdf [file 41598_2020_57782_MOESM1_ESM.pdf]

## **Supporting Information**

**The flexible linker of the secreted FliK ruler is required for export switching of the flagellar protein export apparatus**

**Miki Kinoshita, Seina Tanaka, Yumi Inoue, Keiichi Namba,  
Shin-Ichi Aizawa, and Tohru Minamino**

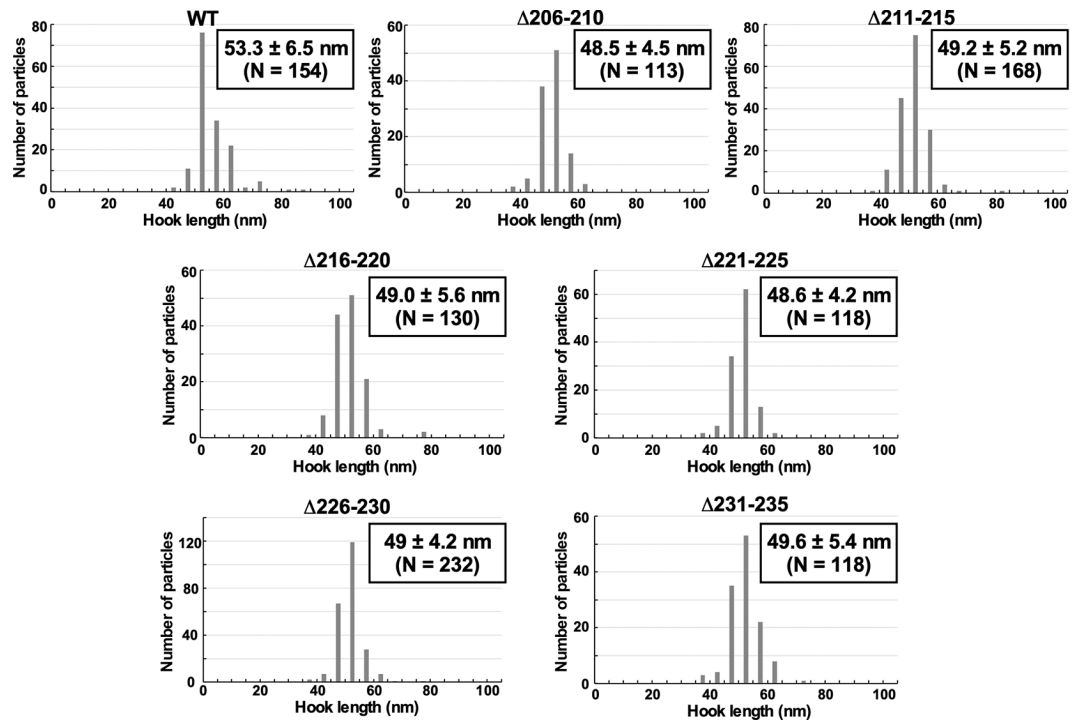

**Fig. S1. Effect of in-frame deletions of five amino acids within the N-terminal region of FliK<sub>L</sub> on the hook length.** Histograms of hook length distribution of TH8426 harboring pMK002 (WT), pMMK1001 (Δ206–210), pMMK1002 (Δ211–215), pMMK1003 (Δ216–220), pMMK1004 (Δ221–225), pMMK1005 (Δ226–230) or pMMK1006 (Δ231–235).

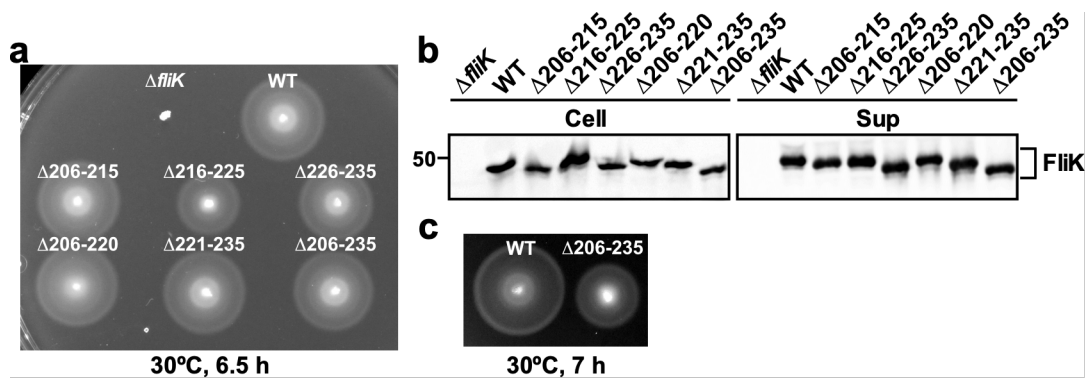

**Fig. S2. Effect of in-frame deletions in FliK<sub>L</sub> on motility.** (a) Motility of TH8426 harboring pTrc99AFF4 ( $\Delta fliK$ ), pMK002 (WT), pMMK1007 ( $\Delta 206-215$ ), pMMK1008 ( $\Delta 216-225$ ), pMMK1009 ( $\Delta 226-235$ ), pMMK1010 ( $\Delta 206-220$ ), pMMK1011 ( $\Delta 221-235$ ) or pMMK1006 ( $\Delta 206-235$ ) in soft agar. Plates were incubated at 30°C for 6.5 hours. (b) Secretion assays of FliK. Immunoblotting using polyclonal anti-FliK antibody, of whole cell proteins (Cell) and culture supernatants (Sup) from the above strains. The position of a 50 kDa marker is shown on the left. (c) Motility of SJW1103 (WT) and MMK1012 ( $\Delta 206-235$ ) in soft agar. Plates were incubated at 30°C for 7 hours.

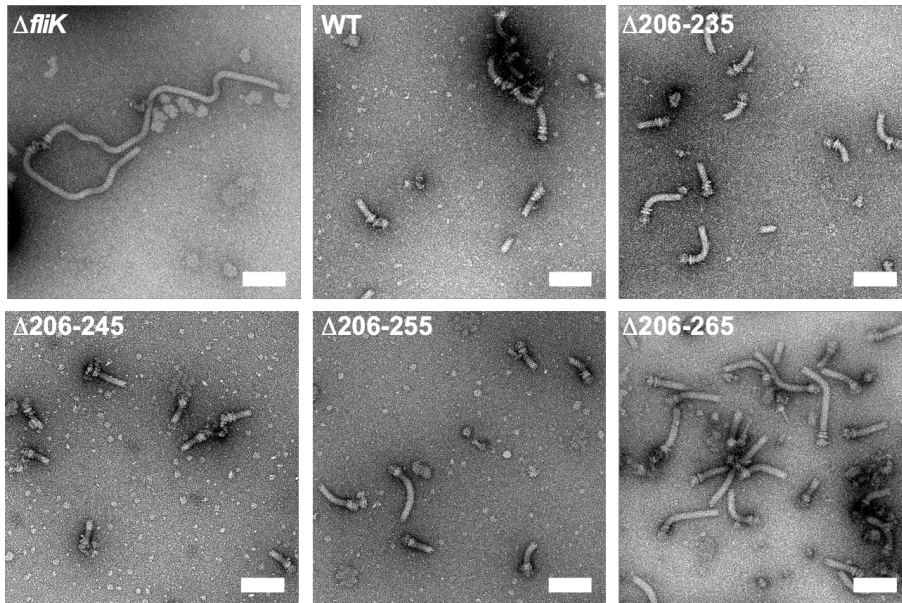

**Fig. 3S.** Electron micrograms of hook-basal bodies and polyhook-basal bodies isolated from TH8426 ( $\Delta fliK$ ), SJW1103 (WT), MMK1012 ( $\Delta 206-235$ ), MMK1013 ( $\Delta 206-245$ ), MMK1014 ( $\Delta 206-255$ ) and MMK1015 ( $\Delta 206-265$ ). Scale bar, 100 nm.

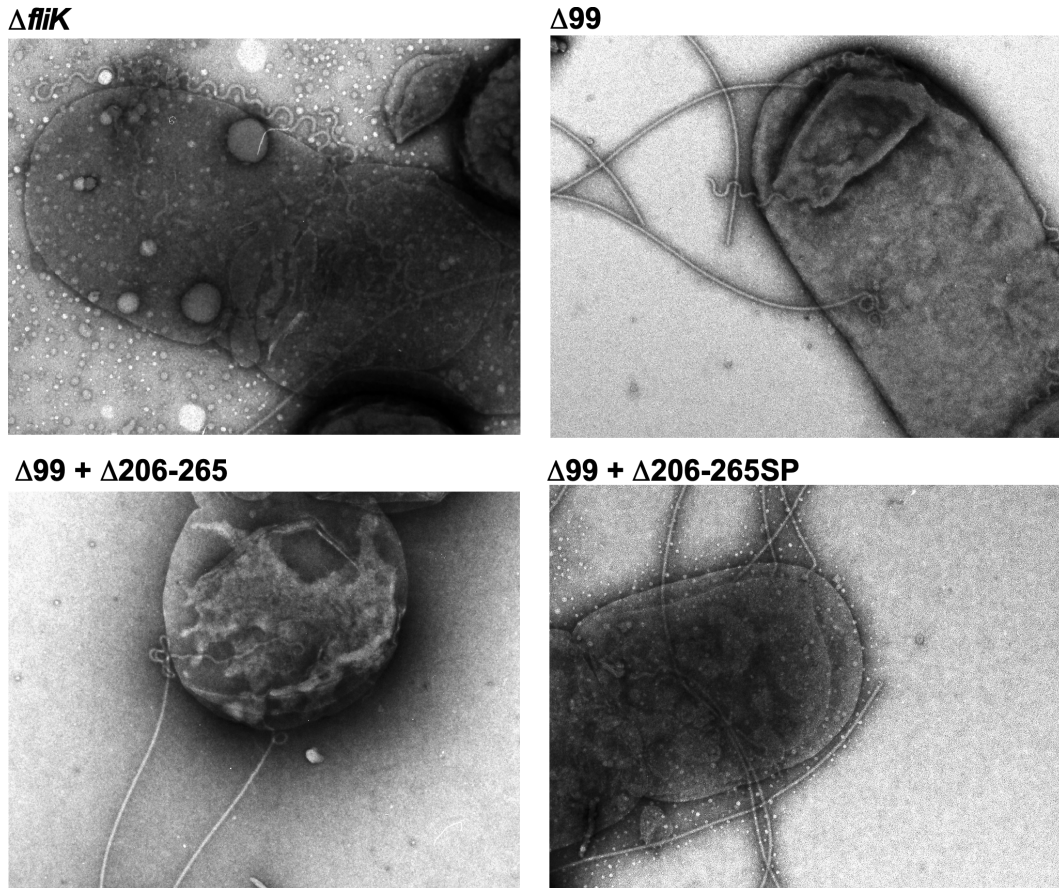

**Fig. S4.** Electron micrographs of TH8426 cells harboring pTrc99A ( $\Delta fliK$ ), pNM201 ( $\Delta 99$ ), pMMK1030 ( $\Delta 99 + \Delta 206-265$ ) or pMMK1030SP ( $\Delta 99 + \Delta 206-265SP$ ). Cells were grown in L-broth containing ampicillin and 1mM IPTG. The cells were suspended in 500  $\mu$ l of cold 50% sucrose solution. After incubation for 15 min on ice, 20 ml of H<sub>2</sub>O was added to the cell suspensions. The cell suspensions were stirred at room temperature and then Mg<sup>2+</sup> was added at a final concentration of 1 mM. After centrifugation, osmotically shocked cells were negatively stained with 1% (W/V) phosphotungstic acid (pH 7.0). Micrographs were taken at a magnification of  $\times 5,000$ .

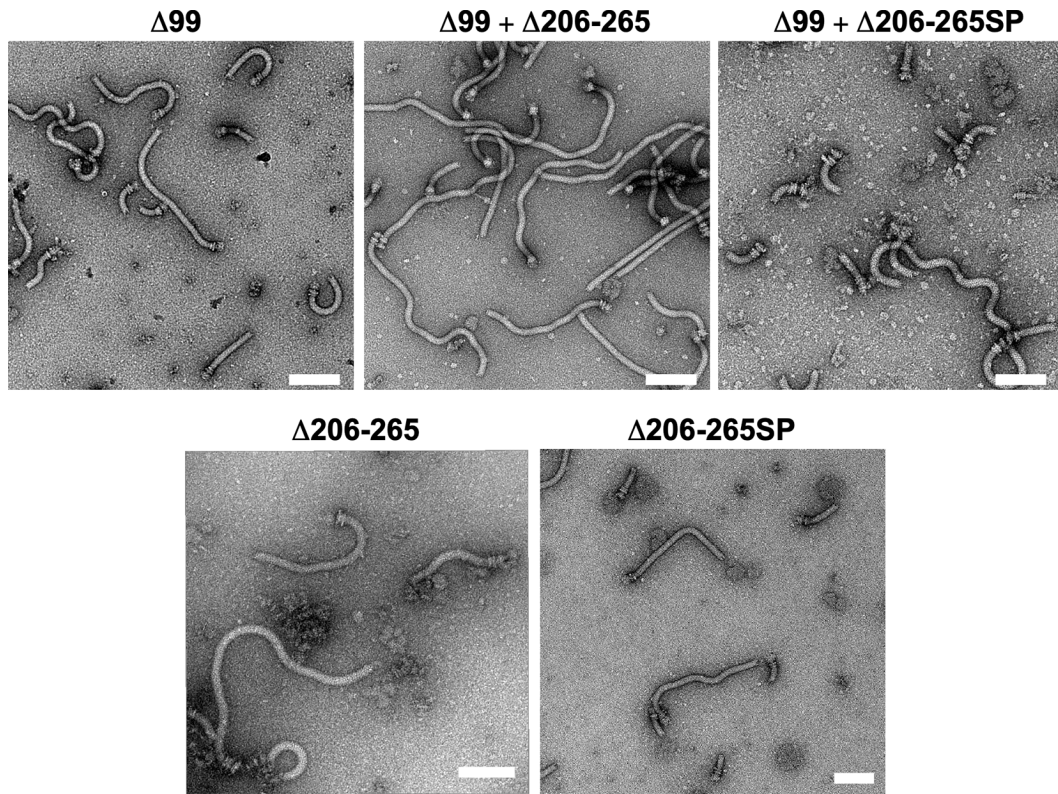

**Fig. S5.** Electron micrographs of hook-basal bodies and polyhook-basal bodies isolated from TH8426 harboring pNM201 ( $\Delta 99$ ), pMMK1030 ( $\Delta 99 + \Delta 206-265$ ), pMMK1030SP ( $\Delta 99 + \Delta 206-265SP$ ), pMMK1015 ( $\Delta 206-265$ ) or pMMK1015SP ( $\Delta 206-265SP$ ). Scale bar, 100 nm.

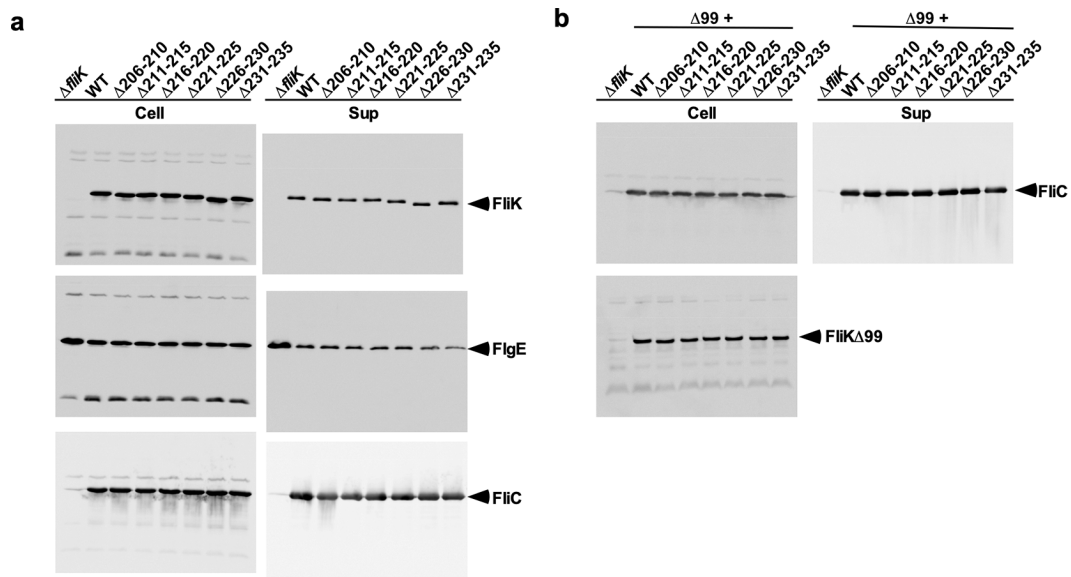

**Fig. S6. Original immunoblots shown in Figure 1.** (a) Effect of deletions of five residues within the N-terminal region of FliK<sub>L</sub> on FliK function. Whole cell proteins (Cell) and culture supernatant fractions (Sup) were prepared from TH8426 harboring pTrc99AFF4 ( $\Delta$ fliK), pMK002 (WT), pMMK1001 ( $\Delta$ 206–210), pMMK1002 ( $\Delta$ 211–215), pMMK1003 ( $\Delta$ 216–220), pMMK1004 ( $\Delta$ 221–225), pMMK1005 ( $\Delta$ 226–230) or pMMK1006 ( $\Delta$ 231–235) grown exponentially at 30°C in L-broth containing ampicillin. 8  $\mu$ l of each protein sample, which was normalized to an optical density of OD<sub>600</sub>, was subjected to SDS-PAGE and was analyzed by immunoblotting with polyclonal anti-FliK, anti-FlgE or anti-FliC antibody. Chemiluminescence signals were captured by a Luminoimage analyser LAS3000. (b) Effect of deletions of five residues in the N-terminal portion of FliK<sub>L</sub> on the switching function of FliK( $\Delta$ 2–99). Whole cell proteins (Cell) and culture supernatants (Sup) were prepared from TH8426 transformed with pTrc99AFF4 ( $\Delta$ fliK), pNM201 ( $\Delta$ 99), pMMK1016 ( $\Delta$ 99 +  $\Delta$ 206–210), pMMK1017 ( $\Delta$ 99 +  $\Delta$ 211–215), pMMK1018 ( $\Delta$ 99 +  $\Delta$ 216–220), pMMK1019 ( $\Delta$ 99 +  $\Delta$ 221–225), pMMK1020 ( $\Delta$ 99 +  $\Delta$ 226–230) or pMMK1021 ( $\Delta$ 99 +  $\Delta$ 231–235). The cells were exponentially grown in L-broth containing ampicillin and 1 mM IPTG with shaking at 30°C. 8  $\mu$ l of each protein sample, which was normalized to an optical density of OD<sub>600</sub>, was subjected to SDS-PAGE and was analyzed by immunoblotting with polyclonal anti-FliC or anti-FliK antibody. Chemiluminescence signals were captured by a Luminoimage analyser LAS3000.

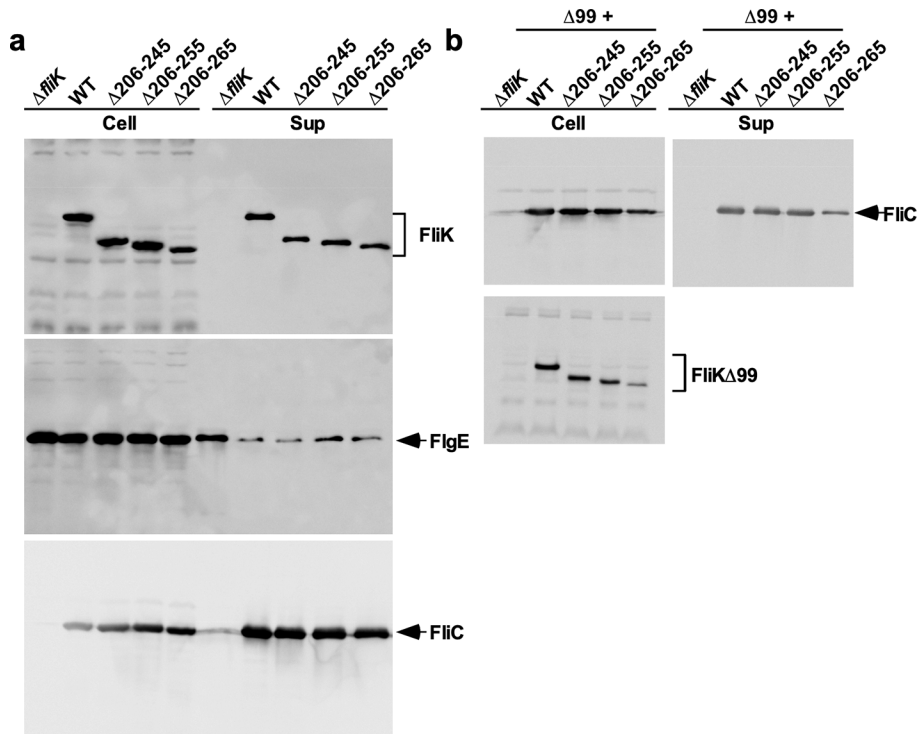

**Fig. S7. Original immunoblots shown in Figure 3.** (a) Effect of deletions of residues 206–245, 206–255 or 206–265 of FliK<sub>L</sub> on FliK function. Whole cell proteins (Cell) and culture supernatant fractions (Sup) were prepared from TH8426 ( $\Delta fliK$ ), SJW1103 (WT), MMK1013 ( $\Delta 206-245$ ), MMK1014 ( $\Delta 206-255$ ) and MMK1015 ( $\Delta 206-265$ ) grown exponentially at 30°C in L-broth. 8  $\mu$ l of each protein sample, which was normalized to an optical density of OD<sub>600</sub>, was subjected to SDS-PAGE and was analyzed by immunoblotting with polyclonal anti-FliK, anti-FlgE or anti-FliC antibody. Chemiluminescence signals were captured by a Luminoimage analyser LAS3000. (b) Effect of deletions of residues 206–245, 206–255 or 206–265 of FliK<sub>L</sub> on the switching function of FliK( $\Delta 2-99$ ). Whole cell proteins (Cell) and culture supernatants (Sup) were prepared from TH8426 harboring pTrc99AFF4 ( $\Delta fliK$ ), pNM201 ( $\Delta 99$ ), pMMK1028 ( $\Delta 99 + \Delta 206-245$ ), pMMK1029 ( $\Delta 99 + \Delta 206-255$ ) or pMMK1030 ( $\Delta 99 + \Delta 206-265$ ). The cells were exponentially grown in L-broth containing ampicillin and 1 mM IPTG with shaking at 30°C. 8  $\mu$ l of each protein sample, which was normalized to an optical density of OD<sub>600</sub>, was subjected to SDS-PAGE and was analyzed by immunoblotting with polyclonal anti-FliC or anti-FliK antibody. Chemiluminescence signals were captured by a Luminoimage analyser LAS3000.



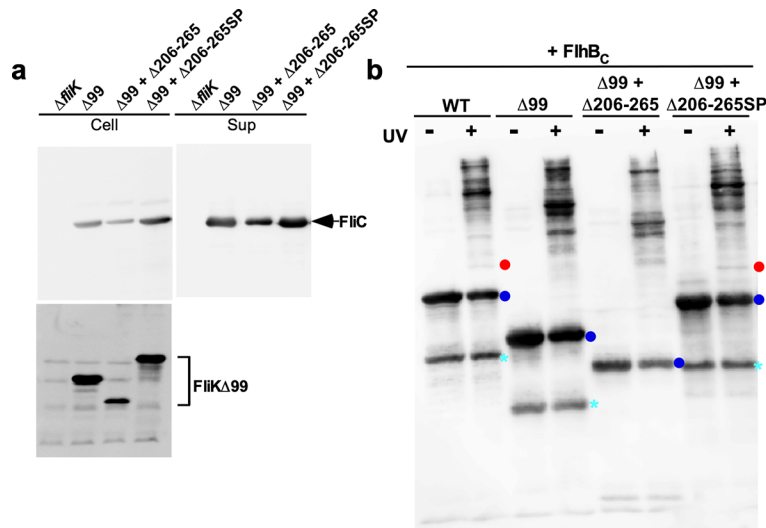

**Fig. S8. Original immunoblots shown in Figure 4.** (a) Secretion assay of FliC. Immunoblotting using polyclonal anti-FliC (1st row) or anti-FliK (2nd row) antibody, of whole cell proteins (Cell) and culture supernatants (Sup) prepared from TH8426 harboring pTrc99A ( $\Delta fliK$ ), pNM201 ( $\Delta 99$ ), pMMK1030 ( $\Delta 99 + \Delta 206-265$ ) or pMMK1030SP ( $\Delta 99 + \Delta 206-265SP$ ). The cells were exponentially grown in L-broth containing ampicillin and 1 mM IPTG with shaking at 30°C. 8  $\mu$ l of each protein sample, which was normalized to an optical density of OD<sub>600</sub>, was subjected to SDS-PAGE and was analyzed by immunoblotting with polyclonal anti-FliC or anti-FliK antibody. Chemiluminescence signals were captured by a Luminoimage analyser LAS3000. (b) Photo-crosslinking between FliK( $\Delta 2-99$ ) and FliH<sub>B</sub>C. *E. coli* BL21(DE3) cells co-expressing FliK(I304pBPA), FliK( $\Delta 99 + I304pBPA$ ), FliK( $\Delta 99 + \Delta 206-265 + I304pBPA$ ) or FliK( $\Delta 99 + \Delta 206-265SP + I304pBPA$ ) with FliH<sub>B</sub>C were UV-irradiated for 5 min (+) or not irradiated (-), and then analyzed by immunoblotting with polyclonal anti-FliK antibody. The positions of free FliK and FliK-FliH<sub>B</sub>C photo-crosslinked products are shown by blue and red balls, respectively. C-terminal truncated variants of FliK are shown by cyan asterisk.

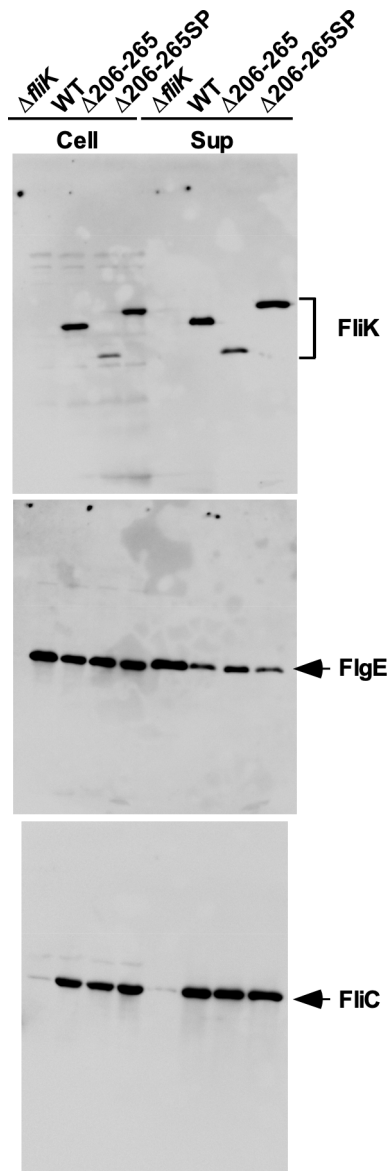

**Fig. S9. Original immunoblots shown in Figure 6.** Whole cell proteins (Cell) and culture supernatant fractions (Sup) were prepared from TH8426 harboring pTrc99AFF4 ( $\Delta fliK$ ), pMK002 (WT), pMMK1015 ( $\Delta 206-265$ ) or pMMK1015SP ( $\Delta 206-265SP$ ). 8  $\mu$ l of each protein sample, which was normalized to an optical density of OD<sub>600</sub>, was subjected to SDS-PAGE and was analyzed by immunoblotting with polyclonal anti-FliK, anti-FlgE or anti-FliC antibody. Chemiluminescence signals were captured by a Luminoimage analyser LAS3000.
